# Supplementary material for: Fluoride adsorption on a cubical ceria nanoadsorbent: function of surface properties
Source: Royal Society of Chemistry journal article supplement (doi:10.1039/c6ra16962g), 2016-01-01
Supplement: c6ra16962g1.pdf [file c6ra16962g1.pdf]

## Fluoride adsorption on cubical ceria nanoadsorbent: Function of surface properties<sup>†</sup>

Ankita Dhillon,<sup>1</sup> Tarun Sharma,<sup>2</sup> Sarvesh K Soni,<sup>3\*</sup> and Dinesh Kumar<sup>1\*</sup>

<sup>1</sup>Department of Chemistry, Banasthali University, Rajasthan-304022, India

<sup>2</sup>Centre for Bio-design, Translational Health Science and Technology Institute

Department of Biotechnology, Ministry of Science and Technology, Govt of India), Gurgaon - 122016, Haryana, India

<sup>3</sup>Centre for Advanced Materials and Industrial Chemistry, School of Applied Sciences, RMIT University, Melbourne, VIC, Australia-3001

### Supplementary information

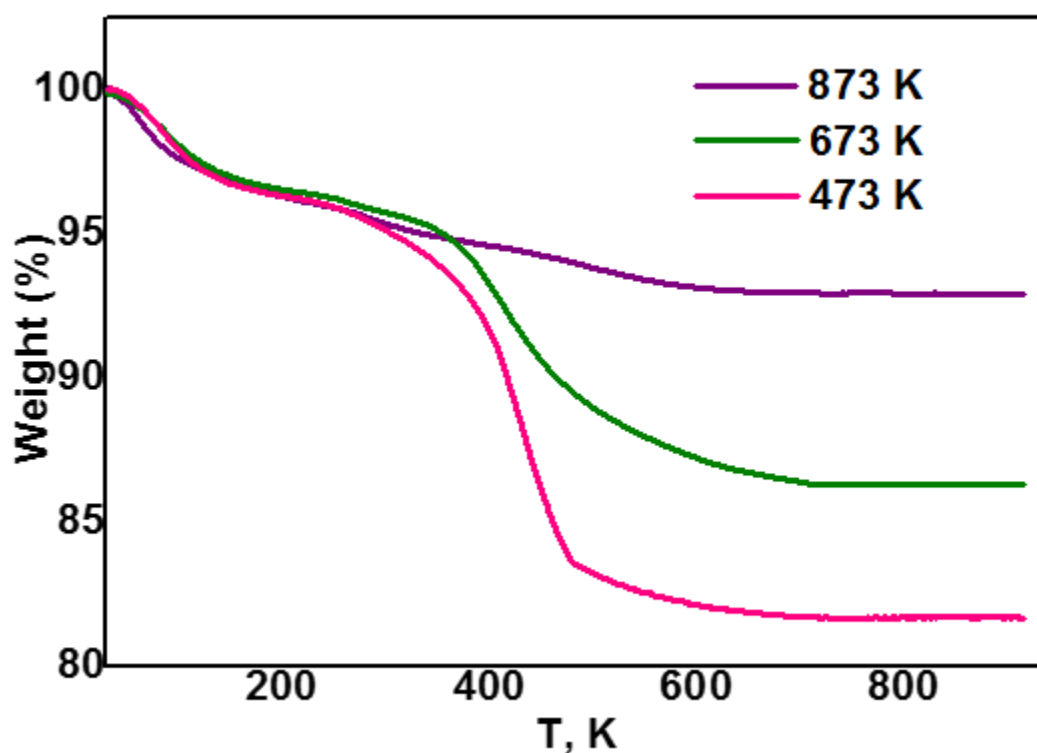

Fig. S1 TGA curves of cubical ceria adsorbent calcined at different temperatures

\* Corresponding authors, E-mail: dsbchoudhary2002@gmail.com, sarveshkumar.soni@rmit.edu.au

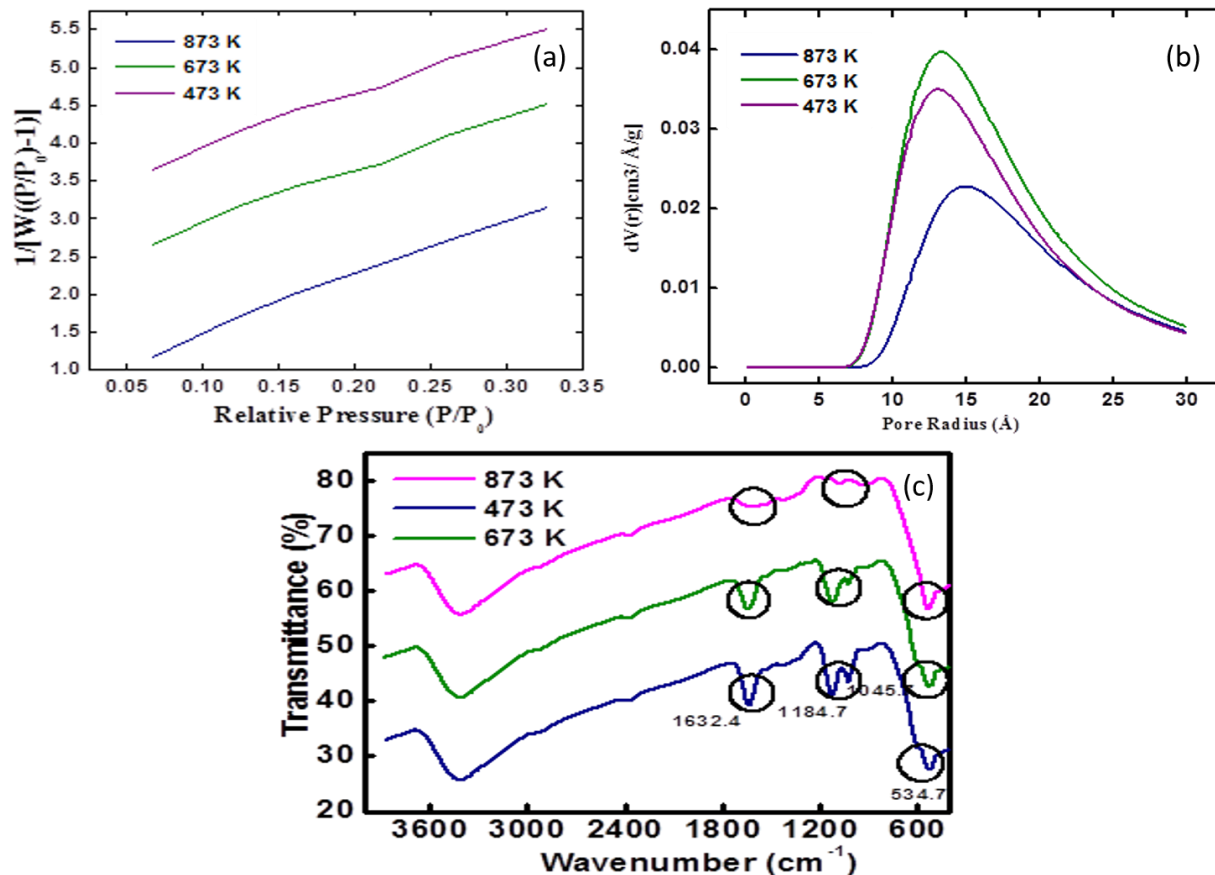

**Fig. S2** BET surface area plots at different temperatures (a), Dubinin–Astakhov plots for the pore radius at different temperatures (b), and FTIR studies of the nanoadsorbent calcined at different temperatures (c).

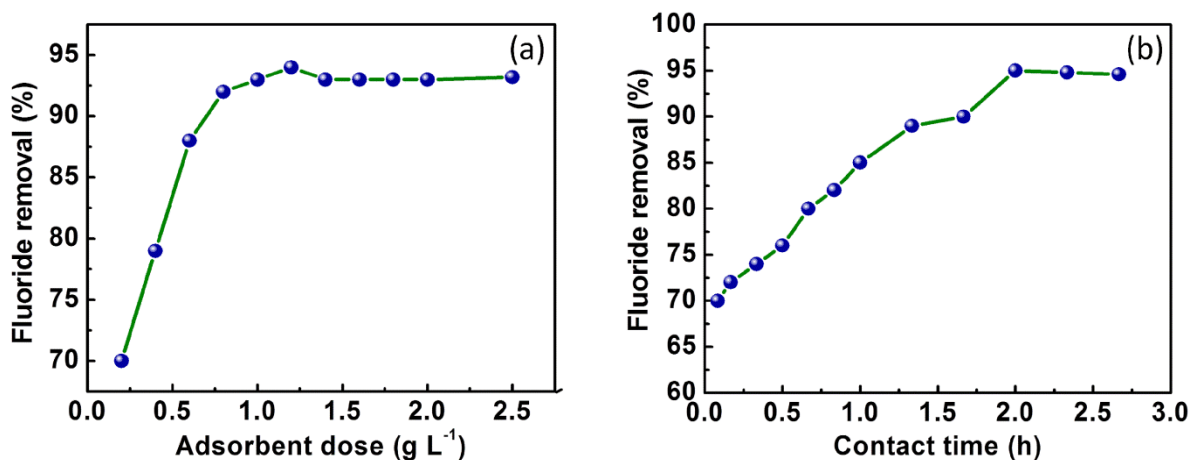

**Fig.S3** Effect of adsorbent dose on fluoride removal efficiency (a) and effect of contact time on fluoride removal efficiency (b).

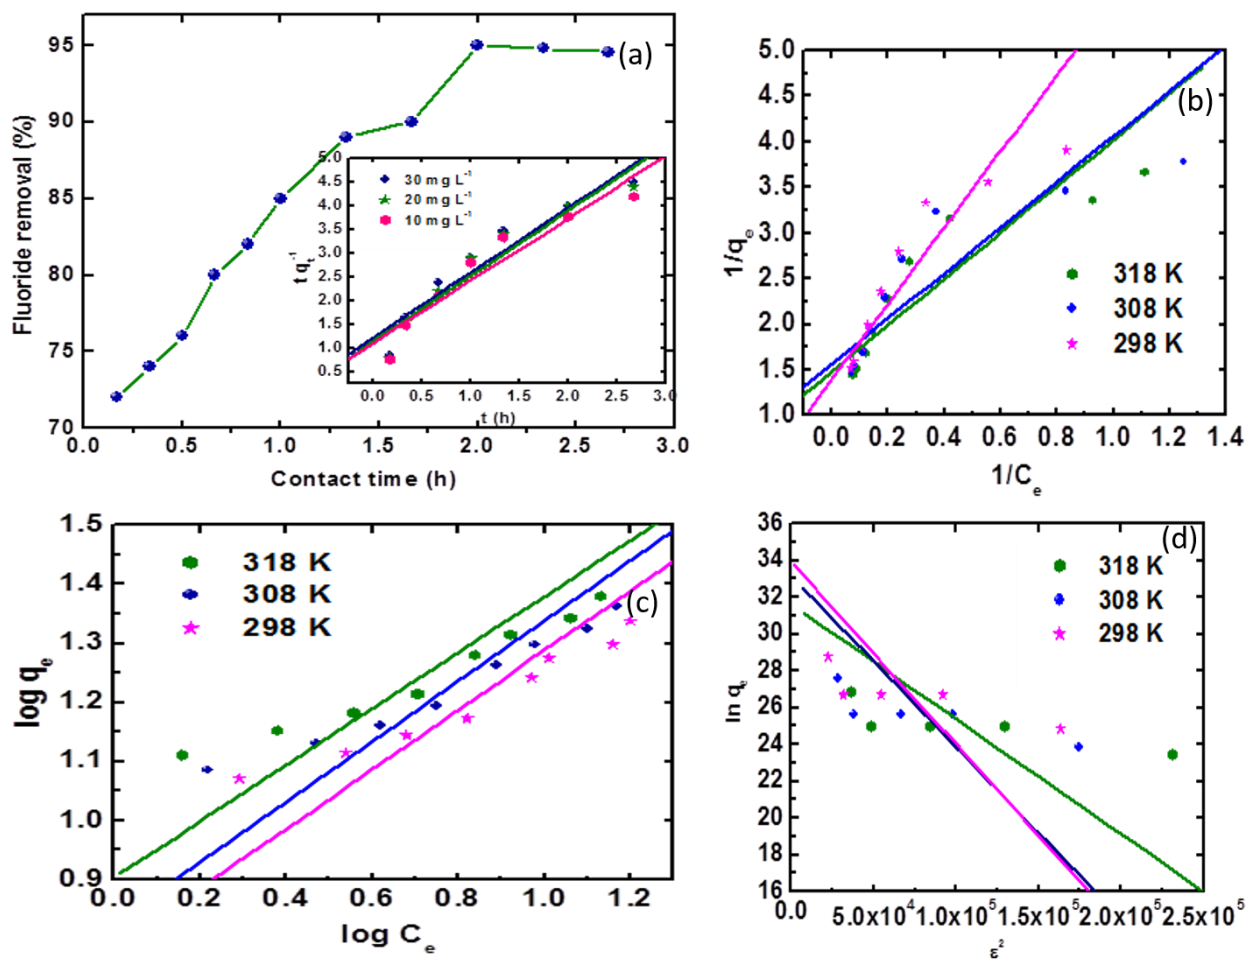

**Fig. S4** Kinetics of fluoride adsorption by using cubical ceria nanoadsorbent. Inset shows pseudo-second-order kinetic model. (a), Langmuir adsorption isotherm curves at different temperatures (b), Freundlich adsorption isotherm curves at different temperatures, and D-R adsorption isotherm curves at different temperatures (d).

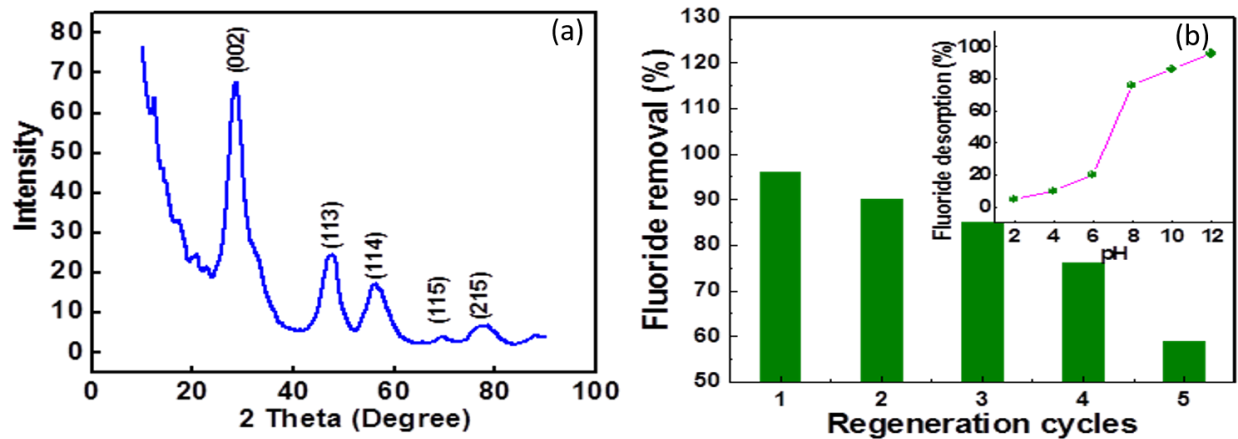

**Fig. S5** XRD patterns of the nanoadsorbent after fluoride adsorption (a), desorption of fluoride as a function of solution pH and regeneration cycles (b).
